# Supplementary material
Source: Springer Nature journal article supplement (https://www.springermedizin.de/resource/supplementary/12888_2012_1096_MOESM3_ESM.pdf/9478994)

**A)** R Med FG (BA9) 4,48,26.  
Positive traits

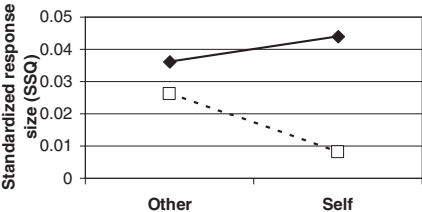

**B)** L Sup FG (BA9) -4,48,31.  
Negative traits

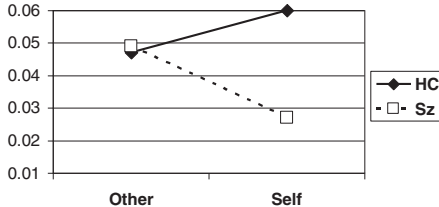

Supplement: MOESM3 [file 9478994]
